# Supplementary material for: Interfacial engineering with carbon–graphite–CuδNi1−δO for ambient-air stable composite-based hole-conductor-free perovskite solar cells
Source: Royal Society of Chemistry journal article supplement (doi:10.1039/d0na00852d), 2020-01-01
Supplement: d0na00852d1.pdf [file d0na00852d1.pdf]

## Supplementary Information

### Interfacial engineering with Carbon-Graphite-Cu<sub>δ</sub>Ni<sub>1-δ</sub>O composites for ambient-air stable hole-conductor-free perovskite solar cells

Yousheng Wang\*, Yuzhao Yang, Shaohang Wu, Cuiling Zhang, Zhen Wang, Jinlong Hu, Chong Liu, Fei Guo and Yaohua Mai\*

*Institute of New Energy Technology, College of Information Science and Technology, Jinan University, Guangzhou 510632, China*

\*E-mail address: [wangys0120@jnu.edu.cn](mailto:wangys0120@jnu.edu.cn);

\*E-mail address: [yaohuamai@jnu.edu.cn](mailto:yaohuamai@jnu.edu.cn);

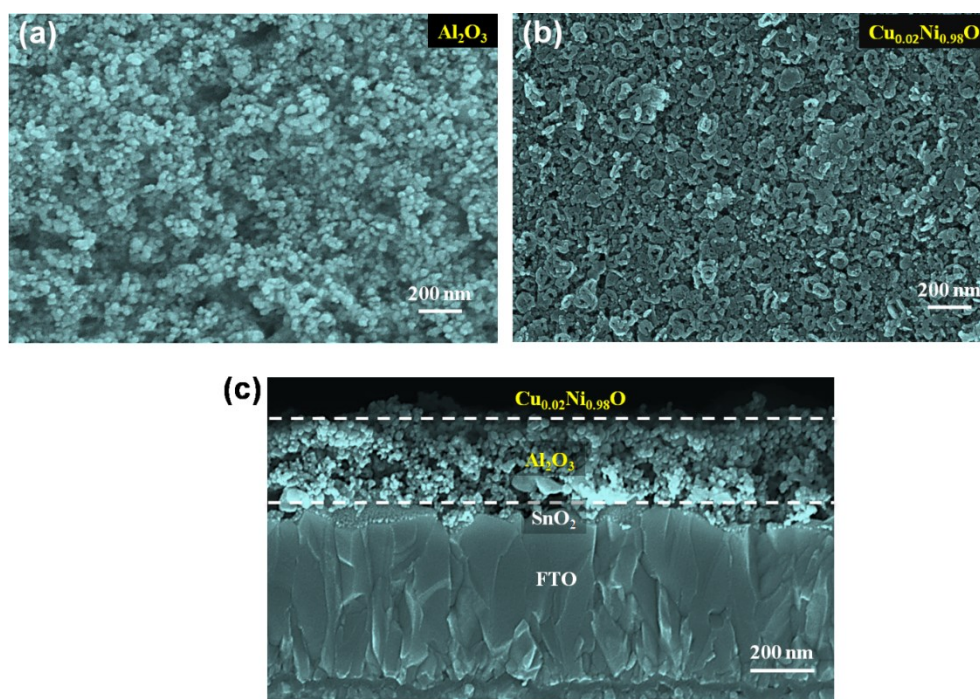

**Figure S1** (a) The surface morphology of Al<sub>2</sub>O<sub>3</sub> and (b) as-synthesized Cu<sub>0.02</sub>Ni<sub>0.98</sub>O thin film and (c) cross-sectional SEM image of FTO/SnO<sub>2</sub>/Al<sub>2</sub>O<sub>3</sub>/Cu<sub>0.02</sub>Ni<sub>0.98</sub>O.

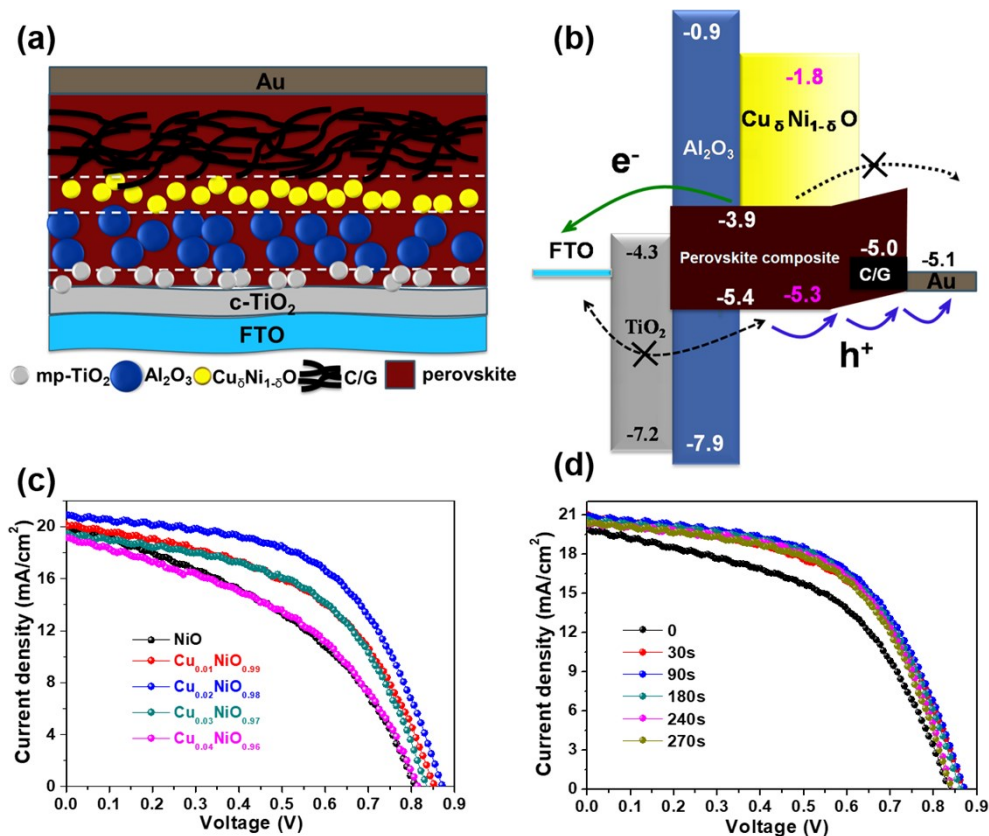

**Figure S2** (a) Schematic of device configuration of FTO/c-TiO<sub>2</sub>/mp-TiO<sub>2</sub>/Al<sub>2</sub>O<sub>3</sub>/Cu<sub>δ</sub>Ni<sub>1-δ</sub>O/C-G/MAPbI<sub>3-x</sub>Cl<sub>x</sub>/Au and (b) corresponding the band energy diagram; (c) *J-V* performance for different Cu doping contents of Cu<sub>δ</sub>Ni<sub>1-δ</sub>O films; (d) continuous 1-sun illumination effect of carbon based HCF device of Cu<sub>0.02</sub>Ni<sub>0.98</sub>O.

**Table S1** Photovoltaic parameters (Figure S2c) of carbon based HCF-PSCs FTO/c-TiO<sub>2</sub>/mp-TiO<sub>2</sub>/Al<sub>2</sub>O<sub>3</sub>/Cu<sub>δ</sub>Ni<sub>1-δ</sub>O/C-G/MAPbI<sub>3-x</sub>Cl<sub>x</sub>/Au for different Cu doping contents of Cu<sub>δ</sub>Ni<sub>1-δ</sub>O films.

| $\delta$ (Cu <sub>δ</sub> Ni <sub>1-δ</sub> O) | V <sub>oc</sub> (V) | J <sub>sc</sub> (mA/cm <sup>2</sup> ) | FF (%) | PCE (%) |
|------------------------------------------------|---------------------|---------------------------------------|--------|---------|
| 0                                              | 0.82                | 20.25                                 | 41.66  | 6.92    |
| 0.01                                           | 0.86                | 20.28                                 | 49.28  | 8.60    |
| 0.02                                           | 0.88                | 20.97                                 | 55.30  | 10.21   |
| 0.03                                           | 0.84                | 19.55                                 | 52.35  | 8.60    |
| 0.04                                           | 0.83                | 19.13                                 | 44.21  | 7.02    |

**Table S2** Photovoltaic parameters (Figure S2d) for continuous 1-sun illumination effect of carbon based HCF device FTO/c-TiO<sub>2</sub>/mp-TiO<sub>2</sub>/Al<sub>2</sub>O<sub>3</sub>/Cu<sub>0.02</sub>Ni<sub>0.98</sub>O/C-G/MAPbI<sub>3-x</sub>Cl<sub>x</sub>/Au.

| Photo-stability (s) | V <sub>oc</sub> (V) | J <sub>sc</sub> (mA/cm <sup>2</sup> ) | FF (%) | PCE (%) |
|---------------------|---------------------|---------------------------------------|--------|---------|
| 0                   | 0.84                | 19.81                                 | 49.94  | 8.32    |
| 30                  | 0.88                | 20.95                                 | 52.87  | 9.75    |
| 90                  | 0.88                | 20.97                                 | 55.30  | 10.21   |
| 180                 | 0.87                | 20.62                                 | 55.41  | 9.95    |
| 240                 | 0.85                | 20.26                                 | 56.67  | 9.76    |
| 270                 | 0.85                | 20.30                                 | 55.85  | 9.64    |

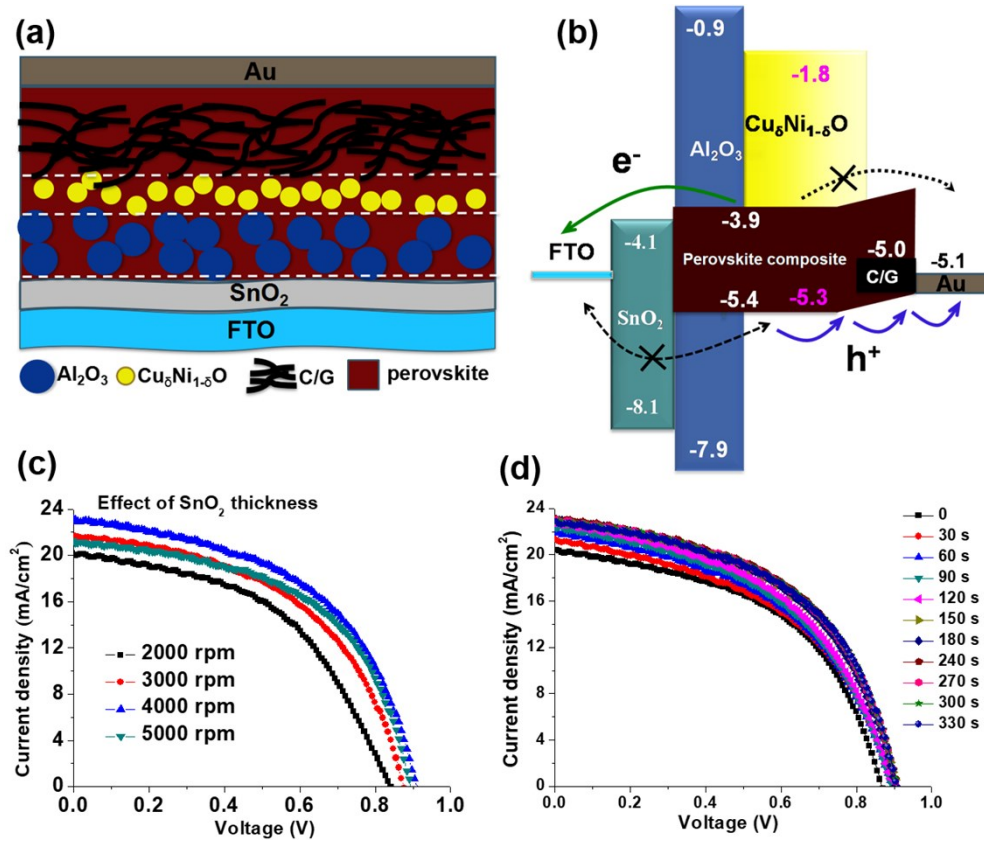

**Figure S3** (a) Schematic of device configuration of FTO/SnO<sub>2</sub>/Al<sub>2</sub>O<sub>3</sub>/Cu<sub>0.02</sub>Ni<sub>0.98</sub>O/C-G/MAPbI<sub>3-x</sub>Cl<sub>x</sub>/Au and (b) corresponding the band energy diagram; (c) corresponding *J-V* performance for different thicknesses of SnO<sub>2</sub> films; (d) continuous 1-sun illumination effect of Carbon and SnO<sub>2</sub> based HCF device for 4000 rpm of SnO<sub>2</sub>.

**Table S3** Photovoltaic parameters (Figure S3c) of carbon and SnO<sub>2</sub> based HCF-PSCs FTO/SnO<sub>2</sub>/Al<sub>2</sub>O<sub>3</sub>/Cu<sub>0.02</sub>Ni<sub>0.98</sub>O/C-G/MAPbI<sub>3-x</sub>Cl<sub>x</sub>/Au for different rpm of SnO<sub>2</sub>.

| Spin-coating speed of SnO <sub>2</sub> precursor | V <sub>oc</sub> (V) | J <sub>sc</sub> (mA/cm <sup>2</sup> ) | FF (%) | PCE (%) |
|--------------------------------------------------|---------------------|---------------------------------------|--------|---------|
| 2000 rpm                                         | 0.84                | 20.01                                 | 47.64  | 8.01    |
| 3000 rpm                                         | 0.88                | 21.57                                 | 49.98  | 9.49    |
| 4000 rpm                                         | 0.91                | 23.01                                 | 52.12  | 10.92   |
| 5000 rpm                                         | 0.90                | 21.09                                 | 53.28  | 10.12   |

**Table S4** Photovoltaic parameters (Figure S3d) for continuous 1-sun illumination effect of carbon and SnO<sub>2</sub> based HCF device of FTO/(4000 rpm) SnO<sub>2</sub>/Al<sub>2</sub>O<sub>3</sub>/Cu<sub>0.02</sub>Ni<sub>0.98</sub>O/C-G/MAPbI<sub>3-x</sub>Cl<sub>x</sub>/Au.

| Photo stability (s) | Voc (V) | Jsc (mA/cm <sup>2</sup> ) | FF (%) | PCE (%) |
|---------------------|---------|---------------------------|--------|---------|
| 0                   | 0.87    | 20.37                     | 50.34  | 8.89    |
| 30                  | 0.90    | 21.23                     | 47.80  | 9.14    |
| 90                  | 0.90    | 21.92                     | 47.66  | 9.41    |
| 120                 | 0.89    | 22.39                     | 47.87  | 9.54    |
| 150                 | 0.90    | 22.68                     | 48.36  | 9.88    |
| 180                 | 0.91    | 22.97                     | 49.98  | 10.45   |
| 210                 | 0.91    | 23.02                     | 50.10  | 10.50   |
| 240                 | 0.91    | 23.01                     | 52.12  | 10.92   |
| 270                 | 0.91    | 22.90                     | 51.05  | 10.64   |
| 300                 | 0.91    | 22.83                     | 51.40  | 10.68   |
| 330                 | 0.91    | 22.71                     | 51.26  | 10.60   |

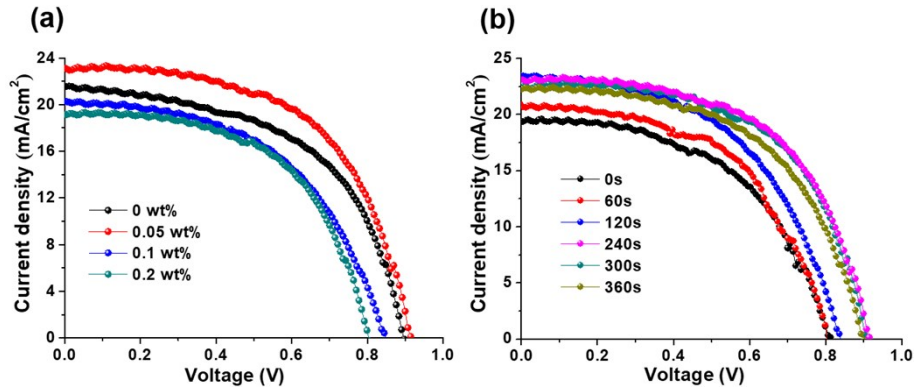

**Figure S4** (a)  $J$ - $V$  performance for different concentrations of  $\text{Cu}_{0.02}\text{Ni}_{0.98}\text{O}$  NPs in C-G- $\text{Cu}_{0.02}\text{Ni}_{0.98}\text{O}$  composite films. (b)  $J$ - $V$  performance for the continuous 1-sun illumination effect of C-G- $\text{Cu}_{0.02}\text{Ni}_{0.98}\text{O}$  composites and  $\text{SnO}_2$  based HCF device of  $\text{FTO}/\text{c-SnO}_2/\text{Al}_2\text{O}_3/\text{Cu}_{0.02}\text{Ni}_{0.98}\text{O}/\text{C-G-Cu}_{0.02}\text{Ni}_{0.98}\text{O-MAPbI}_{3-x}\text{Cl}_x/\text{Au}$ .

**Table S5** Photovoltaic parameters (Figure S4a) for different concentrations of  $\text{Cu}_{0.02}\text{Ni}_{0.98}\text{O}$  NPs in C-G- $\text{Cu}_{0.02}\text{Ni}_{0.98}\text{O}$  composite based HCF-PSCs of  $\text{FTO}/\text{SnO}_2/\text{Al}_2\text{O}_3/\text{Cu}_{0.02}\text{Ni}_{0.98}\text{O}/\text{C-G-Cu}_{0.02}\text{Ni}_{0.98}\text{O-MAPbI}_{3-x}\text{Cl}_x/\text{Au}$ .

| Contents of $\text{Cu}_{0.02}\text{Ni}_{0.98}\text{O}$ | $V_{oc}$ (V) | $J_{sc}$ ( $\text{mA}/\text{cm}^2$ ) | FF (%) | PCE (%) |
|--------------------------------------------------------|--------------|--------------------------------------|--------|---------|
| w/o $\text{Cu}_{0.02}\text{Ni}_{0.98}\text{O}$         | 0.90         | 21.47                                | 56.22  | 10.87   |
| 0.05 wt% $\text{Cu}_{0.02}\text{Ni}_{0.98}\text{O}$    | 0.92         | 22.97                                | 56.23  | 11.88   |
| 0.1 wt% $\text{Cu}_{0.02}\text{Ni}_{0.98}\text{O}$     | 0.85         | 20.26                                | 54.70  | 9.42    |
| 0.2 wt% $\text{Cu}_{0.02}\text{Ni}_{0.98}\text{O}$     | 0.81         | 19.13                                | 52.13  | 8.07    |

**Table S6** Photovoltaic parameters (Figure S4b) for continuous 1-sun illumination effect of 0.05 wt%  $\text{Cu}_{0.02}\text{Ni}_{0.98}\text{O}$  NPs in C-G- $\text{Cu}_\delta\text{Ni}_{1-\delta}\text{O}$  composite based HCF device of  $\text{FTO}/\text{SnO}_2/\text{Al}_2\text{O}_3/\text{Cu}_{0.02}\text{Ni}_{0.98}\text{O}/\text{C-G-Cu}_{0.02}\text{Ni}_{0.98}\text{O-MAPbI}_{3-x}\text{Cl}_x/\text{Au}$ .

| Photo stability (s) | $V_{oc}$ (V) | $J_{sc}$ ( $\text{mA}/\text{cm}^2$ ) | FF (%) | PCE (%) |
|---------------------|--------------|--------------------------------------|--------|---------|
| 0                   | 0.82         | 19.38                                | 52.43  | 8.33    |
| 60                  | 0.81         | 20.69                                | 54.20  | 9.08    |
| 120                 | 0.83         | 23.26                                | 54.70  | 10.56   |
| 240                 | 0.92         | 22.97                                | 56.23  | 11.88   |
| 300                 | 0.90         | 22.52                                | 57.91  | 11.74   |
| 360                 | 0.91         | 22.21                                | 57.26  | 11.58   |

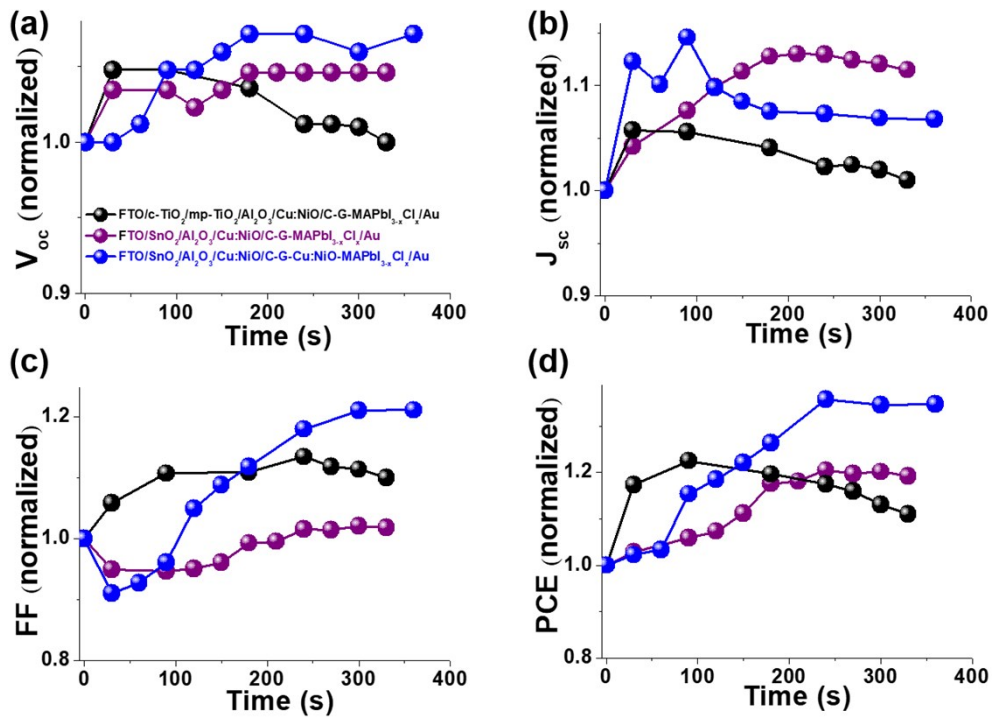

**Figure S5** Light soaking effects of three types HCF devices under continuous 1-sun illumination:  $\text{FTO}/\text{c-TiO}_2/\text{mp-TiO}_2/\text{Al}_2\text{O}_3/\text{Cu}_{0.02}\text{Ni}_{0.98}\text{O}/\text{C-G-MAPbI}_{3-x}\text{Cl}_x/\text{Au}$  (black),  $\text{FTO}/\text{SnO}_2/\text{Al}_2\text{O}_3/\text{Cu}_{0.02}\text{Ni}_{0.98}\text{O}/\text{C-G-MAPbI}_{3-x}\text{Cl}_x/\text{Au}$  (purple) and  $\text{FTO}/\text{SnO}_2/\text{Al}_2\text{O}_3/\text{Cu}_{0.02}\text{Ni}_{0.98}\text{O}/\text{C-G-Cu}_{0.02}\text{Ni}_{0.98}\text{O-MAPbI}_{3-x}\text{Cl}_x/\text{Au}$  (blue).



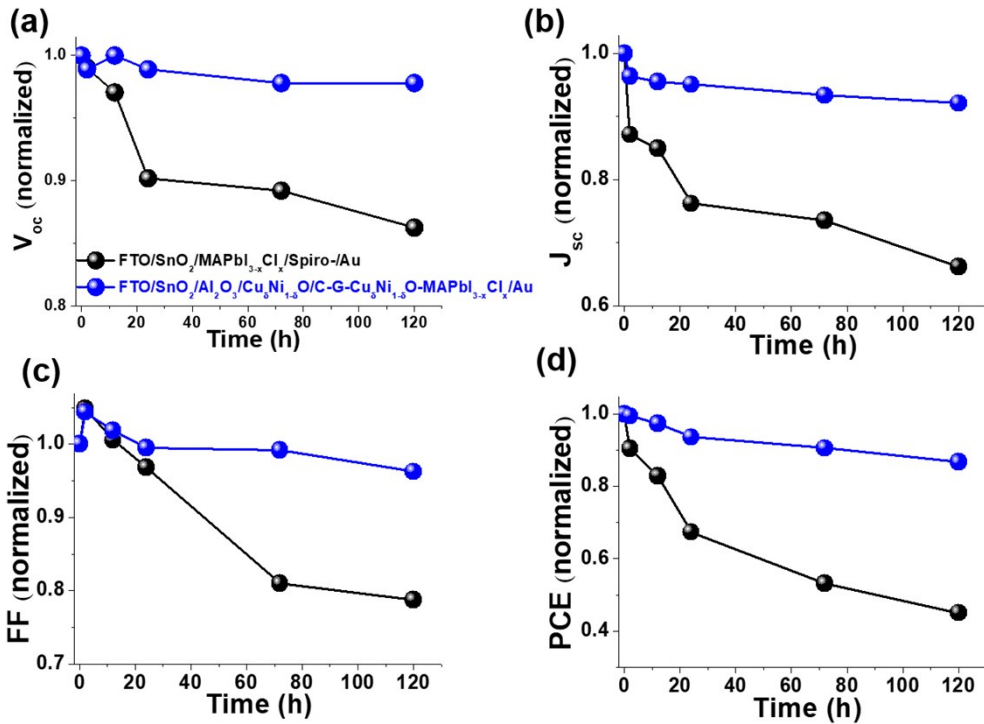

**Figure S6** Thermal- and Air-stability for two devices of FTO/SnO<sub>2</sub>/MAPbI<sub>3-x</sub>Cl<sub>x</sub>/Spiro-/Au (black) and FTO/SnO<sub>2</sub>/Al<sub>2</sub>O<sub>3</sub>/Cu<sub>δ</sub>Ni<sub>1-δ</sub>O/C-G-Cu<sub>δ</sub>Ni<sub>1-δ</sub>O-MAPbI<sub>3-x</sub>Cl<sub>x</sub>/Au (blue) under 85 °C heat treatment and ambient air conditions (humidity 45-50%).

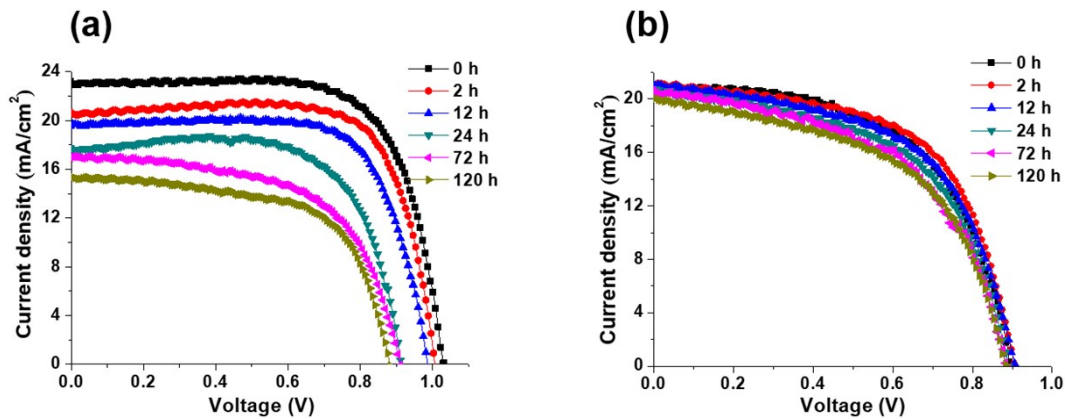

**Figure S7** J-V (a) FTO/SnO<sub>2</sub>/MAPbI<sub>3-x</sub>Cl<sub>x</sub>/Spiro-OMeTAD/Au, (b) FTO/SnO<sub>2</sub>/Al<sub>2</sub>O<sub>3</sub>/Cu<sub>0.02</sub>Ni<sub>0.98</sub>O/C-G-Cu<sub>0.02</sub>Ni<sub>0.98</sub>O-MAPbI<sub>3-x</sub>Cl<sub>x</sub>/Au and corresponding  $J$ - $V$  performance for thermal-stability at 85 °C in ambient air (45-50 % humidity).

**Table S7** Photovoltaic parameters (Figure S6a) of FTO/SnO<sub>2</sub>/MAPbI<sub>3-x</sub>Cl<sub>x</sub>/Spiro-OMeTAD/Au for thermal-stability at 85 °C in ambient air (45-50 % humidity).

| Thermal stability (h) | V <sub>oc</sub> (V) | J <sub>sc</sub> (mA/cm <sup>2</sup> ) | FF (%) | PCE (%) |
|-----------------------|---------------------|---------------------------------------|--------|---------|
| 0                     | 1.03                | 23.20                                 | 75.41  | 18.02   |
| 2                     | 1.02                | 20.51                                 | 75.90  | 15.88   |
| 12                    | 0.99                | 19.71                                 | 72.79  | 14.21   |
| 24                    | 0.92                | 17.68                                 | 70.09  | 11.54   |
| 72                    | 0.91                | 17.06                                 | 58.63  | 9.11    |
| 120                   | 0.88                | 15.36                                 | 57.01  | 7.71    |

**Table S8** Photovoltaic parameters (Figure S6b) of FTO/SnO<sub>2</sub>/Al<sub>2</sub>O<sub>3</sub>/Cu<sub>0.02</sub>Ni<sub>0.98</sub>O/C-G-Cu<sub>0.02</sub>Ni<sub>0.98</sub>O-MAPbI<sub>3-x</sub>Cl<sub>x</sub>/Au for thermal-stability at 85 °C in ambient air (45-50 % humidity).

| Thermal stability (h) | V <sub>oc</sub> (V) | J <sub>sc</sub> (mA/cm <sup>2</sup> ) | FF (%) | PCE (%) |
|-----------------------|---------------------|---------------------------------------|--------|---------|
| 0                     | 0.91                | 21.97                                 | 56.23  | 11.24   |
| 2                     | 0.90                | 21.17                                 | 58.68  | 11.18   |
| 12                    | 0.91                | 20.98                                 | 57.27  | 10.94   |
| 24                    | 0.90                | 20.89                                 | 55.94  | 10.52   |
| 72                    | 0.89                | 20.51                                 | 55.77  | 10.18   |
| 120                   | 0.89                | 20.34                                 | 55.72  | 10.09   |



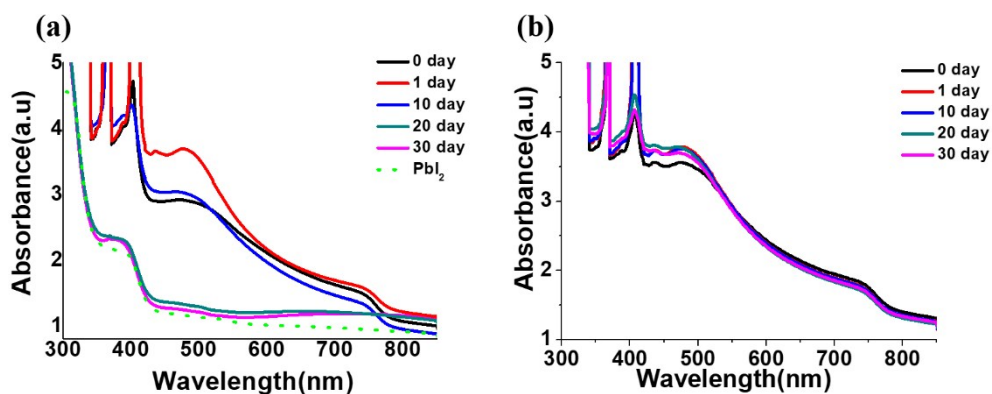

**Figure S8** UV performance and thermal-stability for two films (a) FTO/SnO<sub>2</sub>/MAPbI<sub>3-x</sub>Cl<sub>x</sub>/Spiro-OMeTAD, (b) FTO/SnO<sub>2</sub>/Al<sub>2</sub>O<sub>3</sub>/Cu<sub>0.02</sub>Ni<sub>0.98</sub>O/C-G-Cu<sub>0.02</sub>Ni<sub>0.98</sub>O-MAPbI<sub>3-x</sub>Cl<sub>x</sub> at 85 °C heating in ambient air (humidity 45-50 %).

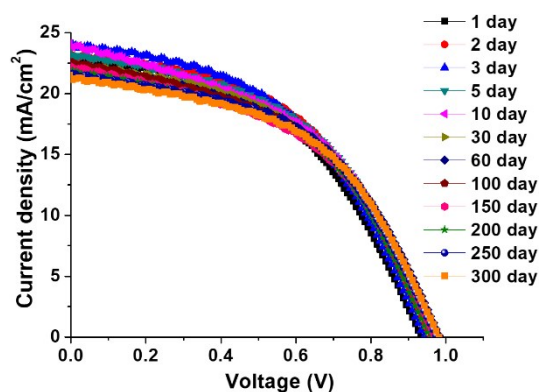

**Figure S9** Schematic of device configurations FTO/SnO<sub>2</sub>/Al<sub>2</sub>O<sub>3</sub>/Cu<sub>0.02</sub>Ni<sub>0.98</sub>O/C-G-Cu<sub>0.02</sub>Ni<sub>0.98</sub>O-MAPbI<sub>3-x</sub>Cl<sub>x</sub>/Au and corresponding *J-V* performance for long-term stability in ambient air (45-50 % humidity).

**Table S9** Photovoltaic parameters (Figure S9) of FTO/SnO<sub>2</sub>/Al<sub>2</sub>O<sub>3</sub>/Cu<sub>0.02</sub>Ni<sub>0.98</sub>O/C-G-Cu<sub>0.02</sub>Ni<sub>0.98</sub>O-MAPbI<sub>3-x</sub>Cl<sub>x</sub>/Au for long-term stability in ambient air (45-50 % humidity).

| Long-term stability | Voc (V) | J <sub>sc</sub> (mA/cm <sup>2</sup> ) | FF (%) | PCE (%) |
|---------------------|---------|---------------------------------------|--------|---------|
| 1 day               | 0.951   | 22.97                                 | 55.41  | 12.11   |
| 2 day               | 0.965   | 23.88                                 | 61.23  | 14.11   |
| 3 day               | 0.962   | 24.08                                 | 58.10  | 13.46   |
| 5 day               | 0.966   | 23.16                                 | 57.24  | 12.81   |
| 10 day              | 0.964   | 23.83                                 | 54.48  | 12.52   |
| 30 day              | 0.965   | 22.34                                 | 57.20  | 12.33   |
| 60 day              | 0.961   | 22.01                                 | 57.53  | 12.12   |
| 100 day             | 0.963   | 22.58                                 | 55.70  | 12.12   |
| 150 day             | 0.965   | 22.12                                 | 56.37  | 12.03   |
| 200 day             | 0.951   | 21.91                                 | 56.44  | 11.76   |
| 250 day             | 0.962   | 21.66                                 | 56.40  | 11.75   |
| 300 day             | 0.951   | 21.18                                 | 56.62  | 11.40   |
